# Supplementary material
Source: HighWire-hosted journal article supplement (http://www.qdcxjkg.com/highwire/filestream/129844/field_highwire_adjunct_files/0/ERJ-01598-2015_OnlineSupplement.pdf)
Supplement: ERJ-01598-2015_OnlineSupplement.pdf [file ERJ-01598-2015_OnlineSupplement.pdf]

**Nilakshi T Waidyatillake (MBBS, MSc, MD)**

**Julie A Simpson (BSc, PGradDip PhD)**

**Katie J. Allen (FRACP, PhD)**

**Caroline J Lodge (MBBS, GDE, PHD)**

**Shyamali C Dharmage (MBBS, MSc, MD, PhD) –Corresponding author**

**Michael J. Abramson (MBBS, FRACP, PhD)**

**Alysha. M. D Livera (PhD)**

**Melanie C Matheson (PhD)**

**Bircan Erbas (PhD)**

**David J Hill (FRACP)**

**Adrian J Lowe (BBS, PhD)**

Online data supplement

**Spirometry** - Biological controls and 3L syringes were used for calibration. Participants were advised to abstain from short acting bronchodilators for four hours and long acting bronchodilators for 12 hours. Height and weight were measured to the nearest 0.1 cm and 0.1 kg respectively. At the 12 year follow up only baseline spirometry was performed (SpiroCard™ PC spirometer, QRS Diagnostic, Plymouth, MN, USA). At the 18 year follow up, both pre and post bronchodilator (Salbutamol) parameters were measured with an Easy One™ (ndd Medical technologies Inc, Andover MA).

**Mediators and confounders**- We have previously published a causal diagram [1] to identify confounders and mediators of the relationship between breastfeeding and lung function. Based on this diagram, the following factors were considered as potential mediators: the number of parental reports of lower and upper respiratory tract infections diagnosed by a doctor within the first two years of life; skin prick test reactivity (to one or more allergen) at 6, 12 and 24 months; and the child's height and BMI measured at 12 years and 18 years. A number of factors were considered as potential confounders: maternal and paternal smoking status (at the time of recruitment to the study), maternal and paternal education (higher education or not) and socioeconomic status of the family (ANU3\_2 classifications according to the father's occupation at the time of recruitment to the study –see reference [2]. Eczema, defined as either doctor diagnosed eczema, or a rash treated with a topical steroid excluding the nappy and the scalp areas, prior to the cessation of breastfeeding was considered as a potential confounder, as we have previously demonstrated that early onset eczema was associated with prolonged breastfeeding in this cohort [3]. A diagnosis of cough rattle and wheeze prior to cessation of breast feeding was also considered as a potential confounder for similar reasons.

**Online repository table S1- Multivariable associations between breastfeeding and pre bronchodilator lung function outcomes at 12 years of age (n=364).**

| Lung function         | Exclusive breastfeeding |              | Total breastfeeding     |         |
|-----------------------|-------------------------|--------------|-------------------------|---------|
| Pre bronchodilator    | Effect per week (95%CI) | P value      | Effect per week (95%CI) | P value |
| <b>Model 1</b>        |                         |              |                         |         |
| FVC (ml)              | -0.5 (-4.9,3.9)         | 0.836        | -0.7(-2.1,0.8)          | 0.355   |
| FEV <sub>1</sub> (ml) | -0.5(-4.4,3.3)          | 0.782        | -0.7(-2.0,0.5)          | 0.258   |
| <b>MEF (ml/s)</b>     | <b>8.9(-1.1,19.0)</b>   | <b>0.082</b> | 0.2(-3.6,3.1)           | 0.883   |
| FER %                 | 0.0(-0.1,0.1)           | 0.875        | 0.0(-0.1,0.1)           | 0.767   |
| <b>Model 2*</b>       |                         |              |                         |         |
| FVC (ml)              | -0.6(-5.2,3.9)          | 0.783        | -0.9(-2.5,0.6)          | 0.228   |
| FEV <sub>1</sub> (ml) | -0.5(-4.6,3.4)          | 0.789        | -0.9(-2.2,0.5)          | 0.205   |
| <b>MEF (ml/s)</b>     | <b>9.5(-0.7,19.7)</b>   | <b>0.069</b> | 0.4(-3.5,3.6)           | 0.978   |
| FER %                 | 0.0(-0.1,0.1)           | 0.999        | 0.0(0,0)                | 0.891   |
| <b>Model 3</b>        |                         |              |                         |         |
| FVC (ml)              | -0.6(-5.4,4.1)          | 0.875        | -1.0(-2.6,0.6)          | 0.226   |
| FEV <sub>1</sub> (ml) | -0.4(-4.6,3.7)          | 0.839        | -1.0(-2.5,0.4)          | 0.151   |
| <b>MEF (ml/s)</b>     | <b>11.2(0.5,21.8)</b>   | <b>0.040</b> | -0.2(-3.5,3.9)          | 0.934   |
| FER %                 | 0.0(-0.1,0.1)           | 0.916        | 0.0(0,0)                | 0.809   |
| <b>Model 4</b>        |                         |              |                         |         |
| FVC (ml)              | 0.3(-4.6,5.1)           | 0.919        | -0.8(-2.5,0.9)          | 0.335   |
| FEV <sub>1</sub> (ml) | -0.1(-4.3,4.2)          | 0.974        | -0.8(-2.2,0.7)          | 0.316   |
| <b>MEF (ml/s)</b>     | <b>8.8(-2.0,19.6)</b>   | <b>0.110</b> | 0.8(-3.0,4.6)           | 0.691   |
| FER %                 | 0.0(-1.0,0.1)           | 0.745        | 0.0(0,0)                | 0.908   |
| <b>Model 5</b>        |                         |              |                         |         |
| FVC (ml)              | 0.2(-5.5,5.8)           | 0.948        | -0.9(-2.8,1.0)          | 0.347   |
| FEV <sub>1</sub> (ml) | 0.2(-4.8,5.3)           | 0.932        | -0.9(-2.5,0.9)          | 0.332   |
| <b>MEF (ml/s)</b>     | <b>10.1(-0.5,20.7)</b>  | <b>0.061</b> | 0.1(-3.6,3.7)           | 0.977   |
| FER %                 | -0.1(0.1,0.1)           | 0.999        | 0.0(0,0)                | 0.891   |

**Effects expressed as mean change in lung function associated with each additional week of breastfeeding, for both exclusive and total duration of breastfeeding; CI – Confidence Interval**

Model 1- Adjusted for gender, height and age

Model 2\* - results presented in main tables –Adjustments as per model 1, with additional adjustment for maternal and paternal status of education, maternal and paternal status of smoking and socioeconomic status

Model 3 –As per model 2, with additional adjustment for onset of eczema prior to cessation of breastfeeding

Model 4 –As per model 2, with additional adjustment for onset of cough rattle and wheeze prior to cessation of breastfeeding

Model 5-As per model 2, height is removed from the model

**Online repository table S2- Multivariable associations between breastfeeding and pre bronchodilator lung function outcomes at 18 years of age (n=409).**

| Lung function<br>Pre<br>bronchodilator | Exclusive breastfeeding    |              | Total breastfeeding        |         |
|----------------------------------------|----------------------------|--------------|----------------------------|---------|
|                                        | Effect per week<br>(95%CI) | P value      | Effect per week<br>(95%CI) | P value |
| <b>Model 1</b>                         |                            |              |                            |         |
| FVC (ml)                               | -3.1(-9.2,3.0)             | 0.325        | -1.1(-3.1,0.9)             | 0.295   |
| FEV <sub>1</sub> (ml)                  | 1.5(-3.9,6.9)              | 0.591        | -0.5(-2.3,1.3)             | 0.587   |
| <b>MEF (ml/s)</b>                      | <b>12.7(1.2,24.2)</b>      | <b>0.030</b> | -0.7(-4.5,3.1)             | 0.785   |
| FER %                                  | <b>0.1(0,0.2)</b>          | <b>0.021</b> | 0(0,0)                     | 0.567   |
| <b>Model 2*</b>                        |                            |              |                            |         |
| FVC (ml)                               | -3.8(-10.1,2.5)            | 0.233        | -1.5(-3.7,0.6)             | 0.168   |
| FEV <sub>1</sub> (ml)                  | 0.2(-5.4,5.8)              | 0.951        | -1.1((-3.0,0.8)            | 0.242   |
| <b>MEF (ml/s)</b>                      | <b>10.5(-1.2,22.2)</b>     | <b>0.078</b> | -1.8(-5.8,2.2)             | 0.373   |
| FER %                                  | <b>0.1(0,0.2)</b>          | <b>0.061</b> | 0(0,0)                     | 0.914   |
| <b>Model 3</b>                         |                            |              |                            |         |
| FVC (ml)                               | -4.2(-10.8,2.4)            | 0.213        | -1.6(-3.9,0.6)             | 0.154   |
| FEV <sub>1</sub> (ml)                  | -0.6(-6.5,5.3)             | 0.846        | -1.2(-3.3,0.7)             | 0.208   |
| <b>MEF (ml/s)</b>                      | <b>9.3(-2.9,21.6)</b>      | <b>0.135</b> | -2.1(-6.3,2.1)             | 0.327   |
| FER %                                  | <b>0.1(0,0.2)</b>          | <b>0.103</b> | 0(0,0)                     | 0.967   |
| <b>Model 4</b>                         |                            |              |                            |         |
| FVC (ml)                               | -2.7(-9.42,4.1)            | 0.438        | -1.4(-3.7,0.9)             | 0.251   |
| FEV <sub>1</sub> (ml)                  | 0(-5.9,5.9)                | 0.915        | -1.2(-3.2,0.9)             | 0.267   |
| <b>MEF (ml/s)</b>                      | <b>7.3(-5.1,19.8)</b>      | <b>0.246</b> | -2.2(-6.5,2.1)             | 0.314   |
| FER %                                  | <b>0.1(0,0.2)</b>          | <b>0.280</b> | 0(0,0)                     | 0.818   |
| <b>Model 5</b>                         |                            |              |                            |         |
| FVC (ml)                               | -0.1(-1.2,6.9)             | 0.971        | -0.5(-2.9,1.9)             | 0.703   |
| FEV <sub>1</sub> (ml)                  | 3.2(-3.0,9.4)              | 0.316        | -0.1(-2.3,2.0)             | 0.905   |
| <b>MEF (ml/s)</b>                      | <b>13.7(1.6,25.5)</b>      | <b>0.026</b> | -0.5(-4.6,3.5)             | 0.793   |
| FER %                                  | <b>0.1(0,0.2)</b>          | <b>0.059</b> | 0(0,0)                     | 0.751   |

**Effects expressed as mean change in lung function associated with each additional week of breastfeeding, for both exclusive and total duration of breastfeeding; CI – Confidence Interval**

Model 1- Adjusted for gender, height and age

Model 2\* - results presented in main tables –Adjustment as per model 1, with additional adjustment for maternal and paternal status of education, maternal and paternal status of smoking and socioeconomic status

Model 3 –As per model 2, with additional adjustment for onset of eczema prior to cessation of breastfeeding

Model 4 –As per model 2, with additional adjustment for onset of cough rattle and wheeze prior to cessation of breastfeeding

Model 5-As per model 2, height removed from the model

**Online repository table S3 - Multivariable associations between breastfeeding and post bronchodilator lung function outcomes at 18 years of age.**

| Lung function<br>Post<br>bronchodilator | Exclusive breastfeeding  |         | Total breastfeeding      |         |
|-----------------------------------------|--------------------------|---------|--------------------------|---------|
|                                         | Effect per week<br>95%CI | P value | Effect per week<br>95%CI | P value |
| <b>Model 1</b>                          |                          |         |                          |         |
| FVC (ml)                                | -3.6(-9.5,2.2)           | 0.220   | -1.2(-3.1,0.8)           | 0.239   |
| FEV <sub>1</sub> (ml)                   | -1.2(-6.2,3.8)           | 0.644   | -0.7(-2.3,0.9)           | 0.426   |
| MEF (ml/s)                              | 5.2(-6.2,16.6)           | 0.371   | -1.4(-5.1,2.3)           | 0.461   |
| FER %                                   | 0.0 (0,0.1)              | 0.201   | 0(0,0)                   | 0.412   |
| <b>Model 2*</b>                         |                          |         |                          |         |
| FVC (ml)                                | -4.0(-10.1,2.0)          | 0.194   | -1.4(-3.5,0.7)           | 0.179   |
| FEV <sub>1</sub> (ml)                   | -2.1(-7.2,3.0)           | 0.425   | -2.8(-6.7,1.1)           | 0.161   |
| MEF (ml/s)                              | 2.7(-8.9,14.2)           | 0.652   | -1.2(-2.9,0.6)           | 0.182   |
| FER %                                   | 0(0,0.1)                 | 0.425   | 0(0,0)                   | 0.862   |
| <b>Model 3</b>                          |                          |         |                          |         |
| FVC (ml)                                | -4.5(-10.8,1.9)          | 0.165   | -1.7(-3.8,0.5)           | 0.132   |
| FEV <sub>1</sub> (ml)                   | -2.6(-8.0,2.8)           | 0.339   | -1.3(-3.2,0.5)           | 0.150   |
| MEF (ml/s)                              | 3.3(-8.8,15.4)           | 0.590   | -2.8(-6.8,1.3)           | 0.187   |
| FER %                                   | 0(0,0.1)                 | 0.377   | 0(0,0)                   | 0.738   |
| <b>Model 4</b>                          |                          |         |                          |         |
| FVC (ml)                                | -2.9(-9.3,3.5)           | 0.376   | -1.8(-4.1,0.4)           | 0.114   |
| FEV <sub>1</sub> (ml)                   | -2.1(-7.6,3.3)           | 0.441   | -1.5(-3.4,0.4)           | 0.118   |
| MEF (ml/s)                              | 0.1(-12.2,12.4)          | 0.986   | -3.4(-7.7,0.8)           | 0.113   |
| FER %                                   | 0(-0.1,0.1)              | 0.991   | 0(0,0)                   | 0.959   |
| <b>Model 5</b>                          |                          |         |                          |         |
| FVC (ml)                                | -0.1(-7.1,6.9)           | 0.980   | -0.4(-2.7,2.0)           | 0.761   |
| FEV <sub>1</sub> (ml)                   | 1.4(-4.6,7.3)            | 0.650   | -0.2(-2.2,1.8)           | 0.865   |
| MEF (ml/s)                              | 6.6(-5.3,18.3)           | 0.276   | -1.5(-5.6,2.5)           | 0.460   |
| FER %                                   | 0(0,0.1)                 | 0.382   | 0(0,0)                   | 0.708   |

**Effects expressed as mean change in lung function associated with each additional week of breastfeeding, for both exclusive and total duration of breastfeeding**

Model 1- Adjusted for gender, height and age

Model 2\* - results presented in main tables –Adjustment as per model 1, with additional adjustment for maternal and paternal status of education, maternal and paternal status of smoking and socioeconomic status

Model 3 –As per model 2, with additional adjustment for onset of eczema prior to cessation of breastfeeding

Model 4 –As per model 2, with additional adjustment for onset of cough rattle and wheeze prior to cessation of breastfeeding

Model 5-As per model 2, height removed from the model

**Online repository table S4- The associations between breastfeeding and potential mediators of the relationship between breastfeeding and lung function**

| <b>Anthropometry*</b>                | <b>Exclusive breastfeeding<br/>(per week)</b> |                   |                | <b>Total breastfeeding<br/>(per week)</b> |                    |              |
|--------------------------------------|-----------------------------------------------|-------------------|----------------|-------------------------------------------|--------------------|--------------|
|                                      | <b>Effect<br/>per week</b>                    | <b>95% CI</b>     | <b>P value</b> | <b>Effect<br/>per week</b>                | <b>95% CI</b>      | <b>P</b>     |
| Height at 12 years (cm)              | 0.03                                          | -0.05,0.11        | 0.489          | 0.01                                      | -0.02,0.035        | 0.558        |
| Height at 18 years (cm)              | <b>0.08</b>                                   | <b>0.01,0.15</b>  | <b>0.022</b>   | <b>0.03</b>                               | <b>0.01,0.05</b>   | <b>0.029</b> |
| BMI at 12 years (kg/m <sup>2</sup> ) | <b>-0.03</b>                                  | <b>-0.09,0.02</b> | <b>0.192</b>   | <b>-0.02</b>                              | <b>-0.36,-0.01</b> | <b>0.025</b> |
| BMI at 18 years (kg/m <sup>2</sup> ) | -0.39                                         | -0.08,0.01        | 0.075          | -0.13                                     | -0.27,0.01         | 0.068        |

| <b>Infections</b>                                                                       | <b>Effect per<br/>week</b> | <b>95%CI</b> | <b>P<br/>value</b> | <b>Effect<br/>per week</b> | <b>95%CI</b>      | <b>P value</b> |
|-----------------------------------------------------------------------------------------|----------------------------|--------------|--------------------|----------------------------|-------------------|----------------|
| Number of Upper respiratory tract infections in 1 <sup>st</sup> year of life (600/620)  | -1.004                     | -1.01,-1.0   | 0.132              | <b>-1.002</b>              | <b>-1.004,1.0</b> | <b>0.044</b>   |
|                                                                                         | <b>Odds<br/>Ratio</b>      | <b>95%CI</b> | <b>P<br/>value</b> | <b>Odds<br/>Ratio</b>      | <b>95%CI</b>      | <b>P value</b> |
| Presence of Lower respiratory tract infection in 1 <sup>st</sup> year of life (617/620) | 0.98                       | 0.96,1.00    | 1.00               | 0.99                       | 0.98,1.00         | 0.245          |

| <b>Sensitization to any allergen</b> | <b>Odds<br/>Ratio</b> | <b>95% CI</b> | <b>P value</b> | <b>Odds<br/>Ratio</b> | <b>95% CI</b> | <b>P value</b> |
|--------------------------------------|-----------------------|---------------|----------------|-----------------------|---------------|----------------|
| 6 months (551/620)                   | 1.01                  | 0.99,1.04     | 0.375          | 1.00                  | 0.99,1.01     | 0.485          |
| 12 months (543/620)                  | 0.99                  | 0.98,1.01     | 0.806          | 0.99                  | 0.99,1.00     | 0.297          |
| 24 months (448/620)                  | 1.02                  | 0.99,1.04     | 0.128          | 1.00                  | 0.99,1.01     | 0.149          |

CI – Confidence Interval: \*Only Height and BMI are adjusted for age and gender

I Upper respiratory tract infections- linear regression models using the log transformed data

¶ Lower respiratory tract infections- logistic regression models, a dichotomous variable was created none vs any lower respiratory tract infections within the first year of life

**Online repository table S5-Association between breastfeeding (both total and exclusive duration) and lung function outcomes at 12 and 18 years stratified by maternal asthma status**

**Effect expressed as per week increase of breastfeeding duration**

| <b>Lung function parameter</b> | <b>Without maternal asthma n=351</b> | <b>With maternal asthma n=269</b> | <b>P for interaction</b> |
|--------------------------------|--------------------------------------|-----------------------------------|--------------------------|
| <b>At 12 years</b>             | <b>Effect per week, 95%CI</b>        | <b>Effect per week, 95%CI</b>     |                          |
| <b>Exclusive breastfeeding</b> |                                      |                                   |                          |
| FVC ml                         | -0.8(-7.6,6.0)                       | -1.2(-7.5,5.1)                    | 0.930                    |
| FEV <sub>1</sub> ml            | 0.1(-5.8,6.1)                        | -1.7(-7.2,3.8)                    | 0.655                    |
| MEF ml/s                       | 12.3(-2.9,27.5)                      | 9.1(-5.1,23.2)                    | 0.758                    |
| FER %                          | 0(-0.1,0.1)                          | 0(-0.1,0.1)                       | 0.614                    |
| <b>Total breastfeeding</b>     |                                      |                                   |                          |
| FVC ml                         | -1.3(-3.6,1.1)                       | -0.8(-2.9,1.2)                    | 0.785                    |
| FEV <sub>1</sub> ml            | -0.7(-2.8,1.3)                       | -1.1(-2.9,0.7)                    | 0.790                    |
| MEF ml/s                       | -0.8(-6.1,4.4)                       | 0.8(-3.8,5.5)                     | 0.635                    |
| FER %                          | 0(0,0.1)                             | 0(-0.1,0)                         | 0.466                    |
| <b>At 18 years</b>             |                                      |                                   |                          |
| <b>Exclusive breastfeeding</b> |                                      |                                   |                          |
| <b>Pre bronchodilator</b>      |                                      |                                   |                          |
| FVC ml                         | 0.5(-8.9,9.8)                        | -7.8(-16.2,0.6)                   | 0.192                    |
| FEV <sub>1</sub> ml            | 0.8(-7.5,9.2)                        | -0.9(-8.3,6.6)                    | 0.762                    |
| MEF ml/s                       | 10.3(-7.1,27.6)                      | 10.2(-5.3,25.6)                   | 0.992                    |
| FER %                          | 0(-0.1,0.1)                          | 0.1(0,0.2)                        | 0.339                    |
| <b>Post bronchodilator</b>     |                                      |                                   |                          |
| FVC ml                         | 0.9(-8.0,9.9)                        | -8.8(-16.8,-0.8)                  | 0.107                    |
| FEV <sub>1</sub> ml            | -0.4(-7.9,7.3)                       | -4.1(-10.9,2.8)                   | 0.472                    |
| MEF ml/s                       | 5.0(-12.2,22.2)                      | 0.2(-15.2,15.5)                   | 0.676                    |
| FER %                          | 0(-0.1,0.2)                          | 0.1(0,0.2)                        | 0.271                    |
| <b>Total breastfeeding</b>     |                                      |                                   |                          |
| <b>Pre bronchodilator</b>      |                                      |                                   |                          |
| FVC ml                         | 0(-3.2,3.1)                          | -3.1(-5.9,-0.3)                   | 0.143                    |
| FEV <sub>1</sub> ml            | -0.1(-2.8,2.7)                       | -2.1(-4.5,0.4)                    | 0.256                    |
| MEF ml/s                       | -0.9(-6.8,4.9)                       | -2.3(-7.6,2.9)                    | 0.713                    |
| FER %                          | 0(-0.1,0.1)                          | 0(0,0.1)                          | 0.801                    |
| <b>Post bronchodilator</b>     |                                      |                                   |                          |
| FVC ml                         | 0.4(-2.6,3.4)                        | -3.4(-6.1,-0.7)                   | 0.054                    |
| FEV <sub>1</sub> ml            | 0.2(-2.4,2.7)                        | -2.5(-4.8,-0.2)                   | 0.107                    |
| MEF ml/s                       | -1.3(-7.1,4.4)                       | -3.9(-9.0,1.3)                    | 0.503                    |
| FER %                          | 0(0,0.1)                             | 0(0,0.1)                          | 0.682                    |

\*Adjusted for gender, age, height, parents education level, parental smoking status and socioeconomic status

**Online repository table S6- Effect of additional\* adjustment for birth weight on the associations between breastfeeding and lung function outcomes.**

| <b>The effect</b>              |                             |              |         |                           |             |         |
|--------------------------------|-----------------------------|--------------|---------|---------------------------|-------------|---------|
|                                | Without birth weight* (226) |              |         | With birth weight** (226) |             |         |
| At 12 years                    | $\beta$                     | (95%CI)      | P value | $\beta$                   | (95%CI)     | P value |
| <b>Exclusive breastfeeding</b> |                             |              |         |                           |             |         |
| FVC (ml)                       | 4.23                        | -1.85,10.32  | 0.171   | 3.80                      | -2.43,10.03 | 0.231   |
| FEV <sub>1</sub> (ml)          | 3.80                        | -1.44,9.04   | 0.154   | 3.03                      | -2.32,8.39  | 0.265   |
| MEF (ml/s)                     | 17.62                       | 4.83,30.42   | 0.007   | 15.01                     | 1.99,28.04  | 0.024   |
| FER (%)                        | 00                          | -0.12,0.18   | 0.795   | 00                        | -0.13,0.12  | 0.647   |
| <b>Total breastfeeding</b>     |                             |              |         |                           |             |         |
| FVC (ml)                       | 1.56                        | -0.48,3.61   | 0.135   | 1.45                      | -0.62,3.52  | 0.170   |
| FEV <sub>1</sub> (ml)          | 1.38                        | -0.38,3.15   | 0.124   | 1.19                      | -0.58,2.98  | 0.187   |
| MEF (ml/s)                     | 2.11                        | -2.26,6.48   | 0.343   | 1.37                      | -3.01,5.75  | 0.539   |
| FER (%)                        | 00                          | -0.04,0.03   | 0.875   | 00                        | -0.04,0.03  | 0.771   |
| <b>At 18 years</b>             |                             |              |         |                           |             |         |
| <b>Pre bronchodilator</b>      |                             |              |         |                           |             |         |
| <b>Exclusive breastfeeding</b> |                             |              |         |                           |             |         |
| FVC (ml)                       | 0.81                        | -6.74,8.35   | 0.833   | 0.50                      | -7.21,8.21  | 0.898   |
| FEV <sub>1</sub> (ml)          | 3.57                        | -3.12,10.26  | 0.294   | 3.37                      | -3.47,10.20 | 0.333   |
| MEF (ml/s)                     | 10.57                       | -3.12,24.27  | 0.130   | 10.39                     | -3.61,24.40 | 0.145   |
| FER (%)                        | 0.06                        | -0.03,0.16   | 0.192   | 0.06                      | -0.03,0.17  | 0.197   |
| <b>Total breastfeeding</b>     |                             |              |         |                           |             |         |
| FVC (ml)                       | 0.85                        | -1.67,3.36   | 0.508   | 0.79                      | -1.76,3.34  | 0.542   |
| FEV <sub>1</sub> (ml)          | 1.04                        | -1.19,3.27   | 0.359   | 0.99                      | -1.27,3.24  | 0.390   |
| MEF (ml/s)                     | 0.37                        | -4.21,4.95   | 0.874   | 0.25                      | -4.39,4.88  | 0.917   |
| FER (%)                        | 0.01                        | -0.02,0.04   | 0.719   | 0.01                      | -0.03,0.04  | 0.732   |
| <b>Post bronchodilator</b>     |                             |              |         |                           |             |         |
| <b>Exclusive breastfeeding</b> |                             |              |         |                           |             |         |
| FVC (ml)                       | -0.19                       | -7.36,6.98   | 0.958   | -0.66                     | -7.97,6.65  | 0.858   |
| FEV <sub>1</sub> (ml)          | 1.04                        | -4.99,7.07   | 0.736   | 1.02                      | -5.14,7.17  | 0.745   |
| MEF (ml/s)                     | 3.21                        | -10.49,16.91 | 0.645   | 3.97                      | -9.99,17.95 | 0.576   |
| FER (%)                        | 0.03                        | -0.05,0.11   | 0.532   | 0.03                      | -0.05,0.12  | 0.410   |
| <b>Total breastfeeding</b>     |                             |              |         |                           |             |         |
| FVC (ml)                       | 0.45                        | -1.95,2.85   | 0.712   | 0.36                      | -2.06,2.78  | 0.771   |
| FEV <sub>1</sub> (ml)          | 0.80                        | -1.20,2.81   | 0.430   | 0.81                      | -1.21,2.84  | 0.430   |
| MEF (ml/s)                     | -0.26                       | -4.81,4.28   | 0.909   | 0.10                      | -4.69,4.48  | 0.964   |
| FER (%)                        | 0.01                        | -0.01,0.04   | 0.411   | 0.02                      | -0.01,0.04  | 0.334   |

\*All models adjusted for gender, age and height at the time of spirometry

\*\*Also adjusted for birth weight.

\*Excludes a child with reported birth weight of 7 Kg



## References

1. Waidyatillake NT, Allen KJ, Lodge CJ, et al. The impact of breastfeeding on lung development and function: a systematic review. *Expert Review of Clinical Immunology* 2013; 9(12): 1253-1265.
2. McMillan J, Jones FL. The ANU3\_2 scale: a revised occupational status scale for Australia. *Journal of Sociology* 2000; 36(1): 64-80.
3. Lowe AJ, Carlin JB, Bennett CM, et al. Atopic disease and breast-feeding—cause or consequence? *Journal of Allergy and Clinical Immunology* 2006; 117(3): 682-687.
